# Supplementary material
Source: PubMed Central journal article supplement (PMC5967354)
Supplement: bhw193_supplementary_table1.pdf [file bhw193_supplementary_table1.pdf]

### Supplementary Table 1

EEG measures in anaesthetized rats injected IV with vehicle or oxaloacetate (n=4 per group)

| Treatment       | Vehicle       |                    |                    |
|-----------------|---------------|--------------------|--------------------|
| Time point      | pre-treatment | 1 h post-treatment | 2 h post-treatment |
| Theta power (%) | 99.9±1.8      | 103.2±10.2         | 100.4±9.7          |
| Gamma power (%) | 92.6±6.9      | 105.7±7.7          | 100.9±3.7          |
| Treatment       | Oxaloacetate  |                    |                    |
| Time point      | pre-treatment | 1 h post-treatment | 2 h post-treatment |
| Theta power (%) | 104.0±3.9     | 98.6±4.5           | 94.8±2.7           |
| Gamma power (%) | 93.8±4.3      | 89.8±7.3           | 99.8±7.9           |
