# Supplementary material
Source: PubMed Central journal article supplement (PMC5967354)

### Supplementary Figure 1

TBS extract of AD brain was examined by immunoprecipitation/Western blotting using the polyclonal anti-A $\beta$  antibody, AW7, for IP and a combination of anti-A $\beta$  antibodies, 2G3 and 21F12, for Western blotting. The first vertical lane of the Western blot shows that the buffer-exchanged TBS extract (AD) contains A $\beta$  monomer and SDS-stable A $\beta$  dimers. The second lane (ID) shows that 3 rounds of IP effectively depleted the extract of all detectable A $\beta$  (immunodepleted, ID). The next lane is the buffer control (-ve). A $\beta$  monomers (M) and dimers (D) are indicated with arrows on the right. Known amounts of synthetic A $\beta$ 1-42 were included to allow estimation of A $\beta$  content in the test sample, which was found to contain ~62 ng/ml A $\beta$  monomer and ~27 ng/ml SDS-stable dimer.

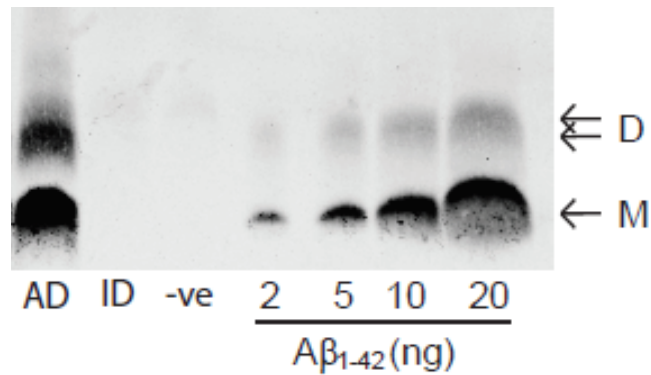

Supplement: supplementary_figure1.pdf [file supplementary_figure1.pdf]
